# Supplementary material for: Powdered Cross-Linked Gelatin Methacryloyl as an Injectable Hydrogel for Adipose Tissue Engineering
Source: MDPI journal article supplement (doi:10.3390/gels10030167), 2024-02-26
Supplement: s1 [file s1]

# Powdered Cross-linked Gelatin Methacryloyl as an Injectable Hydrogel for Adipose Tissue Engineering

Tess De Maeseneer,<sup>a‡</sup> Lana Van Damme,<sup>b‡</sup> Merve Kübra Aktan,<sup>c</sup> Annabel Braem,<sup>c</sup> Paula Moldenaers,<sup>a</sup> Sandra Van Vlierberghe<sup>b</sup> and Ruth Cardinaels<sup>\*a,d</sup>

<sup>a</sup> KU Leuven Department of Chemical Engineering, Soft Matter, Rheology and Technology, Celestijnenlaan 200J box 2424, 3001 Leuven, Belgium.

<sup>b</sup> Polymer Chemistry & Biomaterials Group, Centre of Macromolecular Chemistry, Department of Organic and Macromolecular Chemistry, Ghent University (UGent), Krijgslaan 281, S4-Bis, 9000 Ghent, Belgium.

<sup>c</sup> KU Leuven Department of Materials Engineering, Biomaterials and Tissue Engineering research group, Kasteelpark Arenberg 44 box 2450, 3001 Leuven, Belgium.

<sup>d</sup> Processing and Performance of Materials, Department of Mechanical Engineering, TU Eindhoven, P.O. Box 513, 5600 MB Eindhoven, The Netherlands.

\* email: ruth.cardinaels@kuleuven.be or r.m.cardinaels@tue.nl

## Supplementary Information

### S1 <sup>1</sup>H-NMR spectrum of the methacryloyl modified gelatin (GelMA)

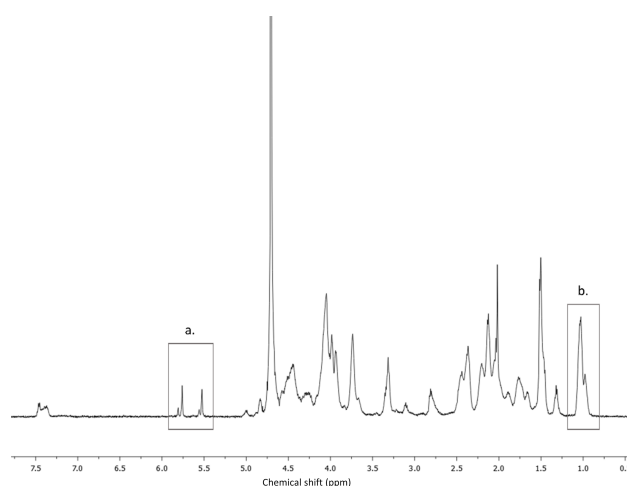

Figure S1: <sup>1</sup>H-NMR spectrum of the methacryloyl modified gelatin (GelMA). The peaks corresponding with the protons of the methacryloyl functionalities are indicated with a. The peak that is marked with b corresponds to the hydrogens from the chemically inert valine, leucine and isoleucine amino acids.

## S2 Microscopic images of the GelMA powder particles

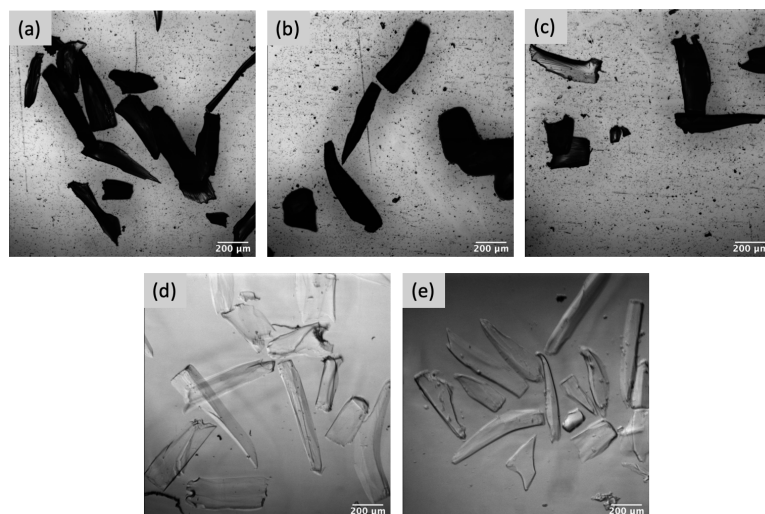

Figure S2: Microscopic images showing the rectangular shape of the  $< 100 \mu\text{m}$  particles (a-c) in a 10 w/v% gel and (d-e) diluted in water.

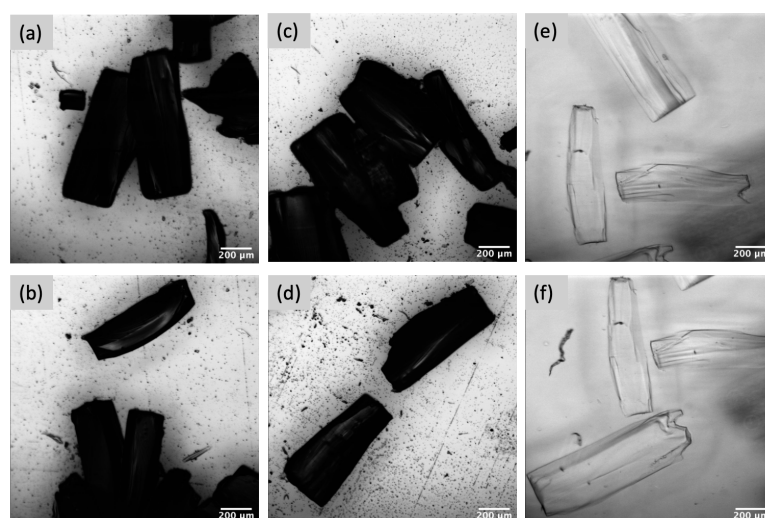

Figure S3: Microscopic images showing the rectangular shape of the  $100\text{-}212 \mu\text{m}$  particles (a-b) in a 10 w/v% gel prior to injection, (c-d) in a 10 w/v% gel after injection through a 18G needle (inner diameter  $838 \mu\text{m}$ ) and (e-f) diluted in water.

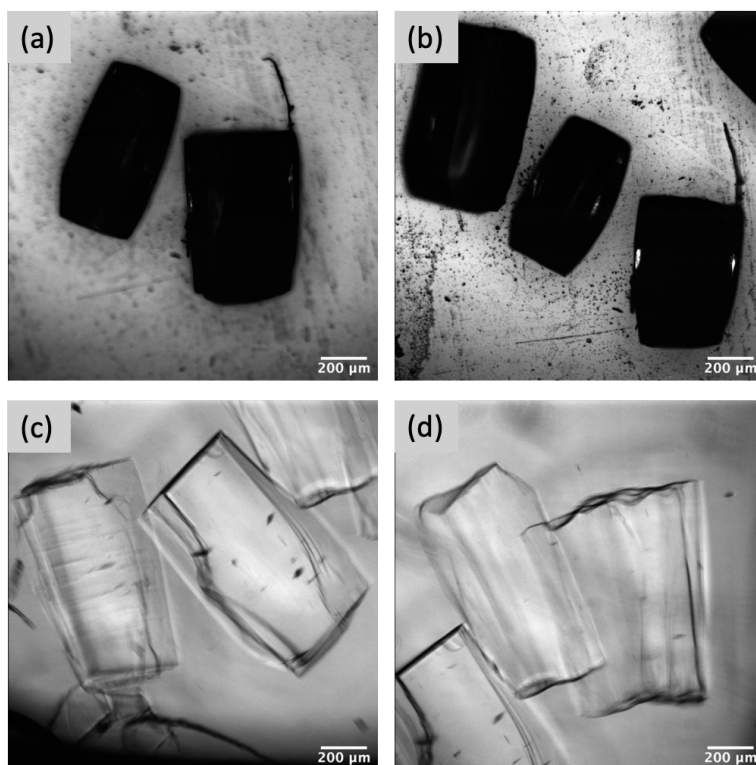

Figure S4: Microscopic images showing the rectangular shape of the 212-300  $\mu\text{m}$  particles (a-b) in a 10 w/v% gel and (c-d) diluted in water.

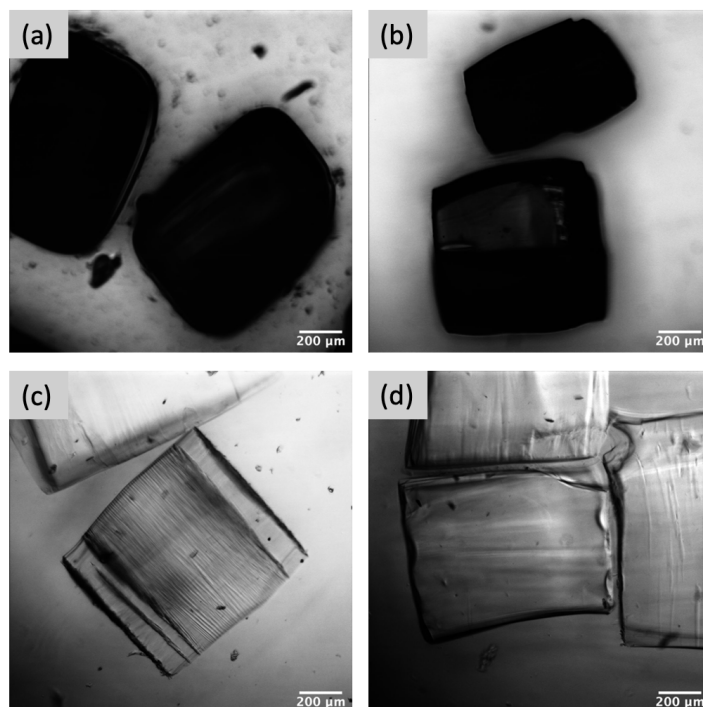

Figure S5: Microscopic images showing the rectangular shape of the 300-400  $\mu\text{m}$  particles (a-b) in a 10 w/v% gel and (c-d) diluted in water.

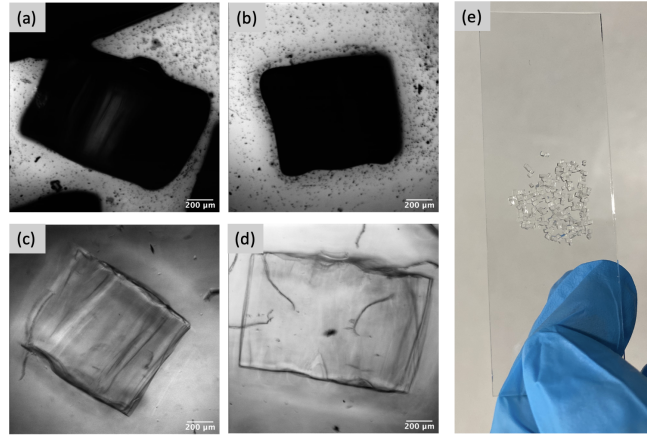

Figure S6: Microscopic images showing the rectangular shape of the 400-500  $\mu\text{m}$  particles (a-b) in a 10 w/v% gel and (b-c) diluted in water. (e) Image of the swollen gel particles in a 10 w/v% gel.

### S3 PSD's of the water-swollen GelMA particles

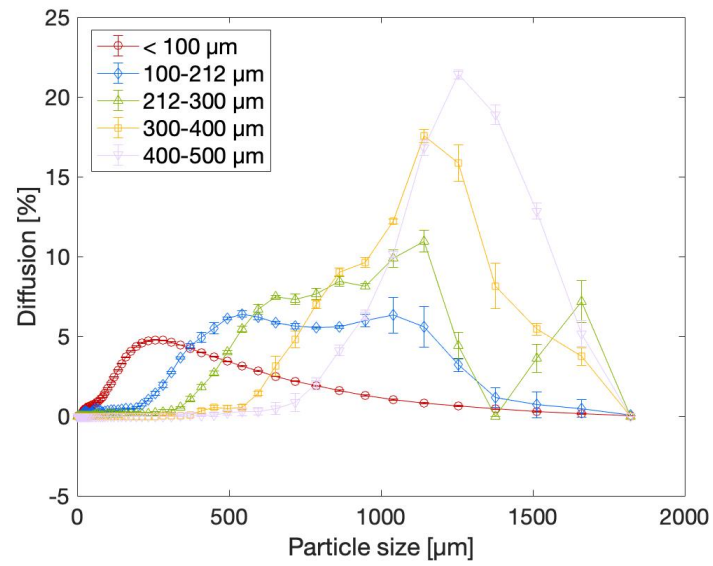

Figure S7: PSD's of particles of size fractions < 100  $\mu\text{m}$ , 100-212  $\mu\text{m}$ , 212-300  $\mu\text{m}$ , 300-400  $\mu\text{m}$  and 400-500  $\mu\text{m}$  swollen in water.

## S4 Raw data of the micromechanics experiments

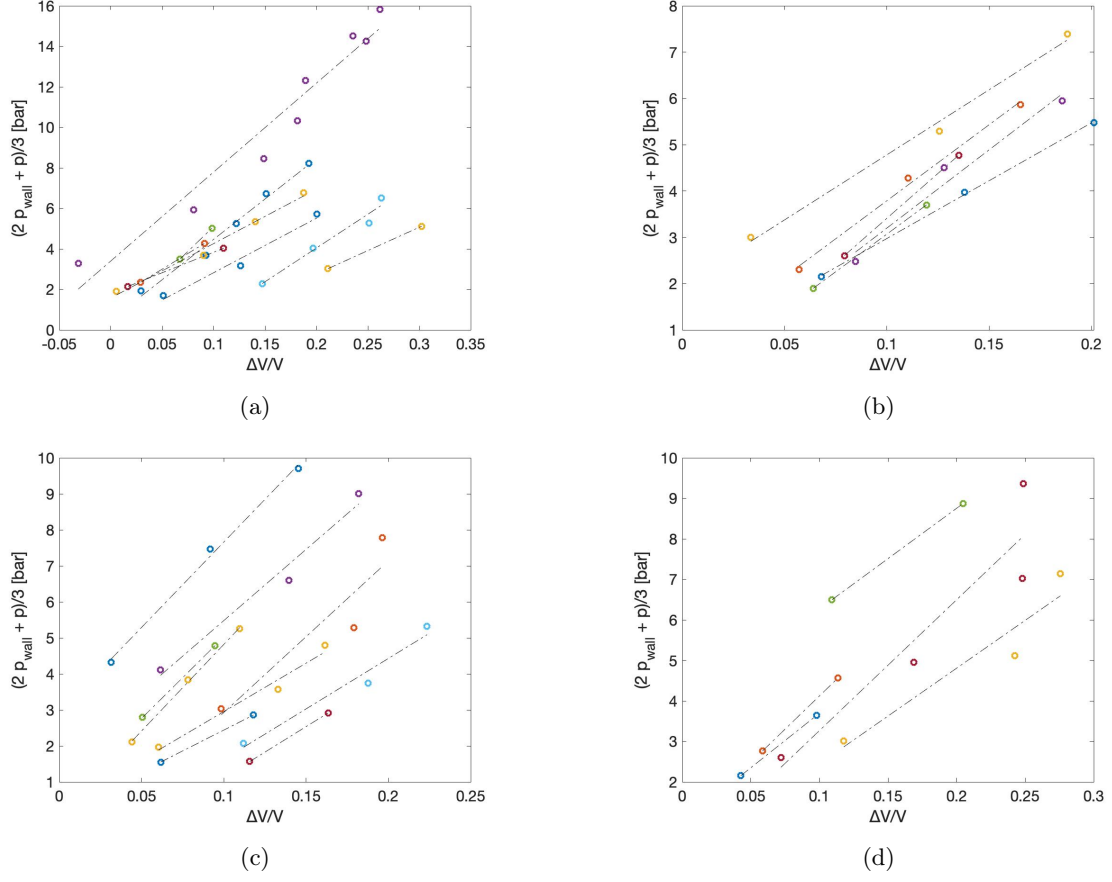

Figure S8: Raw data of  $(2p_{\text{wall}} + p)/3$  plotted against  $\Delta V/V$  used for the calculation of the compression modulus of particles swollen in (a) water, (b) 1 mM NaCl, (c) 10 mM NaCl and (d) diluted PBS.

## S5 Raw data of the zeta potential experiments

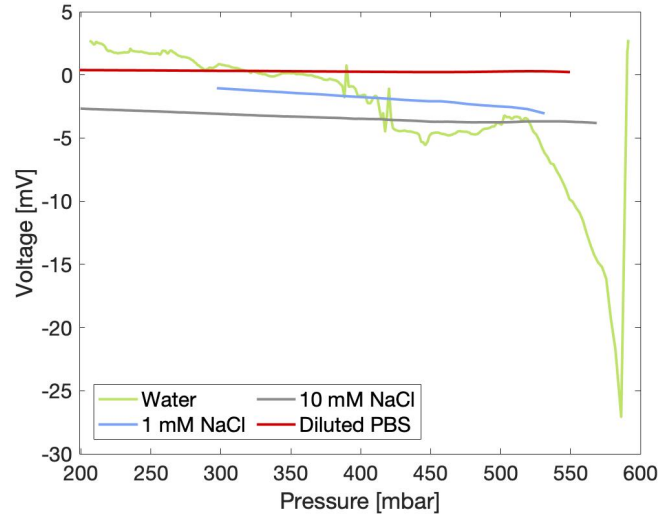

Figure S9: Raw data obtained during zeta potential measurements indicating the unstable measurement of particles swollen in water compared to salt solutions.

## S6 Time sweep of a 10 w/v% bulk GelMA hydrogel

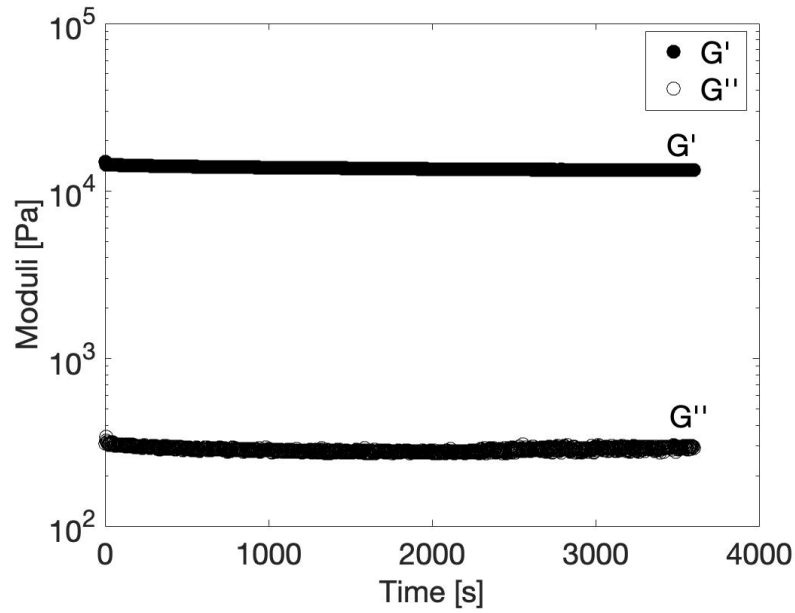

Figure S10: Time sweep at 1 % strain and 10 rad/s of a bulk GelMA hydrogel of 10 w/v% in water at room temperature.

## S7 Strain sweep of the 212-300 $\mu\text{m}$ microgel at various temperatures

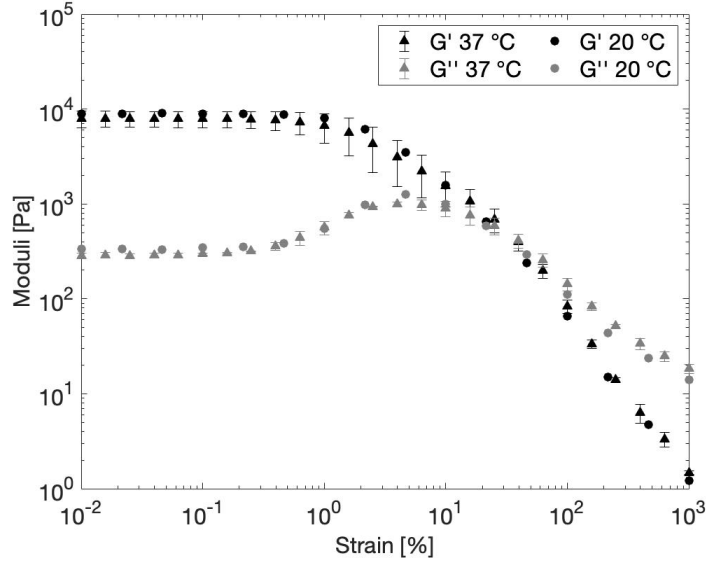

Figure S11: Strain sweep at 10 rad/s of a microgel constituting of 212-300  $\mu\text{m}$  particles in water at 20 °C and 37 °C indicating that temperature has no effect on the yielding.

## S8 Injectability of the GelMA microgels

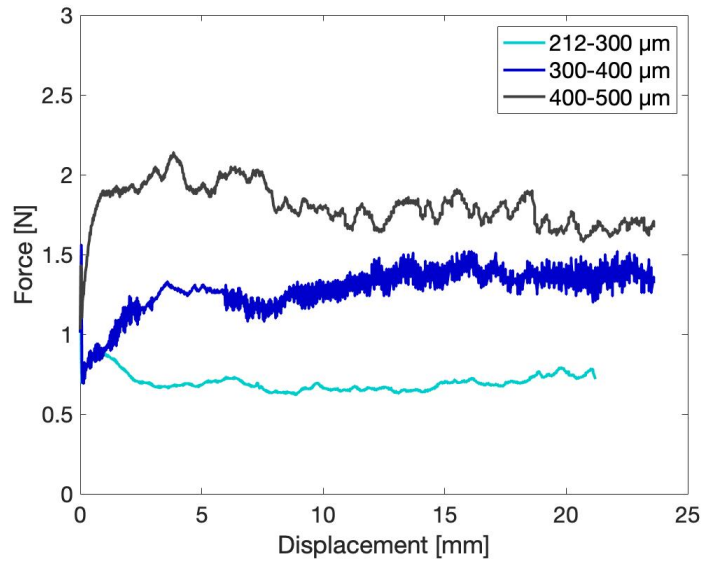

Figure S12: Force versus displacement curves of 10 w/v% hydrogels in water constituting of the 212-300  $\mu\text{m}$ , 300-400  $\mu\text{m}$  and 400-500  $\mu\text{m}$  particle size fractions that were pushed through a syringe of 1.9 mm tip diameter in 42 s.

## S9 CD reproducibility of the diluted PBS-swollen GelMA particles

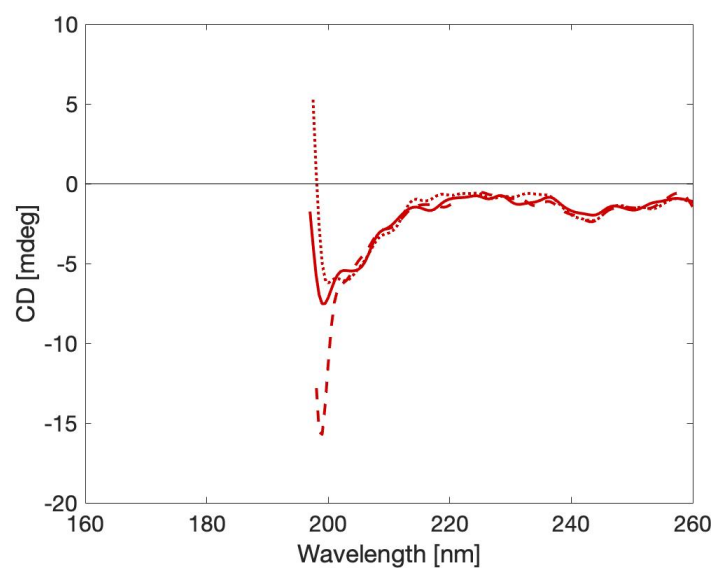

Figure S13: Triplicate spectra showing good reproducibility of 100-212  $\mu\text{m}$  particles swollen in diluted PBS.
